# Supplementary material
Source: HighWire-hosted journal article supplement (doi:10.1101/rna.079895.123)
Supplement: Supplemental_Table_S1.xlsx [file Supplemental_Table_S1.xlsx]

## Sheet: Table S1
Supplementary table 1.	Oligonucleotide sequences used in iMet-A57 and m1A57 RNA ligation assay
Name	5' modification	Sequence (5'-3')
iMet-A57*		AGGUCGAUGGAUCGAAACCAUCCUCUGCUACCA
iMet-m1A57*		AGGUCGAUGGAUCG”AACCAUCCUCUGCUACCA
iMet-5lkrA	Phos	TCGATCCATCGACCTTGCCCATAGAGAGGTCGAGC
iMet-5lkrG	Phos	CCGATCCATCGACCTTGCCCATAGAGAGGTCGAGC
iMet-5lkrC	Phos	GCGATCCATCGACCTTGCCCATAGAGAGGTCGAGC
iMet-5lkrT	Phos	ACGATCCATCGACCTTGCCCATAGAGAGGTCGAGC
iMet-3lkrUni		TGCTACCGACAGTTCACGACagggtccagcgctaggtcacggaTAGCAGAGGATGGTT
iMet-PF		GCTCGACCTCTCTATGGGCA
iMet-PR		TGCTACCGACAGTTCACGAC
iMet-HEX probe	HEX	TCCGTGACCTAGCGCTGGACCCT
*: RNA oligonucleotides; ": m1A modification; Lower case: probe binding sites; Underlined: primer binding sites.
