# Supplementary material
Source: HighWire-hosted journal article supplement (doi:10.1101/rna.079895.123)
Supplement: Supplemental_Table_S2.xlsx [file Supplemental_Table_S2.xlsx]

## Sheet: Table S2
Supplementary table 2.	Oligonucleotide sequences used in the ligation efficiency assay on m1A position and temperature
Name	5' modification	Sequence (5'-3')
DO28m1A*		GGUCUGCGUGGAGGUCG"CGACUCCGUCGCAGACUACGGACCU
DO29A*		\
DO-5LkrT0	Phos	TCGACCTCCACGCAGGCTCCAGCAGTCGTGAGGGC
DO-5LkrT+1	Phos	GTCGACCTCCACGCAGCTCCAGCAGTCGTGAGGGC
DO-5LkrT+2	Phos	CGTCGACCTCCACGCGCTCCAGCAGTCGTGAGGGC
DO-5LkrT+3	Phos	TCGTCGACCTCCACGGCTCCAGCAGTCGTGAGGGC
DO-5LkrT+4	Phos	GTCGTCGACCTCCACGGCTCCAGCAGTCGTGAGGGC
DO-5LkrT+9	Phos	ACGGAGTCGTCGACCTGCTCCAGCAGTCGTGAGGGC
DO-5LkrT-1	Phos	CGACCTCCACGCAGGCTCCAGCAGTCGTGAGGGC
DO-5LkrT-2	Phos	GACCTCCACGCAGAGCTCCAGCAGTCGTGAGGGC
DO-5LkrT-3	Phos	ACCTCCACGCAGACGCTCCAGCAGTCGTGAGGGC
DO-5LkrT-4	Phos	CCTCCACGCAGACGCTCCAGCAGTCGTGAGGGC
DO-5LkrT-5	Phos	CTCCACGCAGACCGCTCCAGCAGTCGTGAGGGC
DO-3lkr0		GGACGCAGGTCCATGGCTGAgcgtgcaggcactggtcacggccacCTGCGACGGAGTCG
DO-3lkr+1		GGACGCAGGTCCATGGCTGAgcgtgcaggcactggtcacggccacTCTGCGACGGAGTC
DO-3lkr+2		GGACGCAGGTCCATGGCTGAgcgtgcaggcactggtcacggccacGTCTGCGACGGAGT
DO-3lkr+3		GGACGCAGGTCCATGGCTGAgcgtgcaggcactggtcacggccacTGTCTGCGACGGAG
DO-3lkr+4		GGACGCAGGTCCATGGCTGAgcgtgcaggcactggtcacggccacTAGTCTGCGACGGA
DO-3lkr+9		GGACGCAGGTCCATGGCTGAgcgtgcaggcactggtcacggccacGGTCCGTAGTCTGCG
DO-3lkr-1		GGACGCAGGTCCATGGCTGAgcgtgcaggcactggtcacggccacTGCGACGGAGTCGT
DO-3lkr-2		GGACGCAGGTCCATGGCTGAgcgtgcaggcactggtcacggccacGCGACGGAGTCGTC
DO-3lkr-3		GGACGCAGGTCCATGGCTGAgcgtgcaggcactggtcacggccacCGACGGAGTCGTCG
DO-3lkr-4		GGACGCAGGTCCATGGCTGAgcgtgcaggcactggtcacggccacCGACGGAGTCGTCGA
DO-3lkr-5		GGACGCAGGTCCATGGCTGAgcgtgcaggcactggtcacggccacGACGGAGTCGTCGAC
DO-PF		GCCCTCACGACTGCTGGAGC
DO-PR		GGACGCAGGTCCATGGCTGA
DO-Prb-Cy5	Cy5	GTGGCCGTGACCAGTGCCTGCACGC
*: RNA oligonucleotides; ": m1A modification; Lower case: probe binding sites; Underlined: primer binding sites.
