# Supplementary material
Source: HighWire-hosted journal article supplement (doi:10.1101/rna.079895.123)
Supplement: Supplemental_Table_S3.xlsx [file Supplemental_Table_S3.xlsx]

## Sheet: Table S3
Supplementary table 3.	Oligonucleotide sequences used in yeast tRNA-Phe m1A58 assay
Name	5' modification	Sequence (5'-3')
Yst-Phe58A-5lkr	Phos	TCGAACACAGGACCTCCGCTCCAGCAGTCGTGAGGGC
Yst-Phe58A-3lkr		GACGCAGGTCCATGGCTGAgcgtgcaggcactggtcacggccacGTGCGAATTCTGTGGA
Yst-Phe5p-5lkr	Phos	CCCAACTGAGCTAAATCCGCTCACGCTGGACGTTCGAG
Yst-Phe5p-3lkr		CCTGCTACCGACAGTTCACGACagccacggtcaggctgcgtccgaTCAGTCTGGCGCTCT
Yst-Phe58A-PF1		GCCCTCACGACTGCTGGAGC
Yst-Phe58A-PR1		GACGCAGGTCCATGGCTGA
Yst-Phe5p-PF2		CTCGAACGTCCAGCGTGAGC
Yst-Phe5p-PR2		CCTGCTACCGACAGTTCACGAC
Yst-Phe58A probe	Cy5	GTGGCCGTGACCAGTGCCTGCACGC
Yst-Phe5p probe	TR	TCGGACGCAGCCTGACCGTGGCT
Lower cases: probe binding sites; Underlined: primer binding sites.
