# Supplementary material
Source: HighWire-hosted journal article supplement (doi:10.1101/rna.079895.123)
Supplement: Supplemental_Table_S4.xlsx [file Supplemental_Table_S4.xlsx]

## Sheet: Table S4
Supplementary table 4.	Oligonucleotide sequences used in tRNA-iMet and tRNA-His m1A58 assay
Name	5' modification	Sequence (5'-3')
iMet58A-5lkr	Phos	TCGATCCATCGACCTTGCCCATAGAGAGGTCGAGC
iMet58A-3lkr		TGCTACCGACAGTTCACGACacgctccgacgccaggacgtctTAGCAGAGGATGGTT
iMet3p-5lkr	Phos	GGTTTCGATCCATCGACTGCCCATAGAGAGGTCGAGC
iMet3p-3lkr		TGCTACCGACAGTTCACGACacgctccgacgccaggacgtctTGGTAGCAGAGGAT
iMet-PF		GCTCGACCTCTCTATGGGCA
iMet-PR		TGCTACCGACAGTTCACGAC
iMet probe	HEX	AGACGTCCTGGCGTCGGAGCGTA
HisA58-5lkr	Phos	TCGAACCGAGGTTGCGCTCACGCTGGACGTTCGAG
HisA58-3lkr		CCTGCTACCGACAGTTCACGACagccacggtcaggctgcgtccgaTGCCGTGACTCGGAT
His3p-5lkr	Phos	CGGATTCGAACCGAGGTGCTCACGCTGGACGTTCGAG
His3p3lkr		CCTGCTACCGACAGTTCACGACagccacggtcaggctgcgtccgatGGTGCCGTGACT
His-PF		CTCGAACGTCCAGCGTGAGC
His-PR		CCTGCTACCGACAGTTCACGAC
His probe	TR	TCGGACGCAGCCTGACCGTGGCT
Trp-5lkr	Phos	AGACGCGCTACCATTGAGCAACGTCCGAGTTCGAGC
Trp-3lkr		ACCAGTCCAGCCGATCGCggtcgacctgccgcagctgacgtgaccTTCTGATCTGGAGTC
Trp-PF		GCTCGAACTCGGACGTTGCT
Trp-PR		ACCAGTCCAGCCGATCGC
Trp probe	FAM	GGTCACGTCAGCTGCGGCAGGTCGACC
Lower case: probe binding sites; Underlined: primer binding sites.
