# Supplementary material
Source: HighWire-hosted journal article supplement (doi:10.1101/rna.079895.123)
Supplement: Supplemental_Table_S5.xlsx [file Supplemental_Table_S5.xlsx]

## Sheet: Table S5
Supplementary table 5.	Oligonucleotide sequences used in mt-tRNA-Val m1a9 and 28S rRNA m1A1322 assay
Name	5' modification	Sequence (5'-3')
mtVal-9m1A-5lkr	Phos	TACACTCTGgctcacgctggacgttcgag
mtVal-9m1A-3lkr-TR		CCTGCTACCGACAGTTCACGACagccacggtcaggctgcgtccgaCTTTGTGTTAAGC
mtVal-5p-5lkr	Phos	TAAGCTACACTCTGgctcacgctggacgttcgag
mtVal-5p-3lkr-TR		CCTGCTACCGACAGTTCACGACagccacggtcaggctgcgtccgaTGGGAGCTTTGTGT
mtVal3p-5lkr	Phos	TTGAAATCTCCTAgctccagcagtcgtgagggc
mtVal3p-3lkr-cy5		GGACGCAGGTCCATGGCTGAgcgtgcaggcactggtcacggccacCGGTCAAGTTAAG
28sRNA-m1A-5lkr	Phos	TCAAGACGGGTCGGGgctcacgctggacgttcgag
28sRNA-m1A-3lkr-TR		CCTGCTACCGACAGTTCACGACagccacggtcaggctgcgtccgaCTCCTTGGTCCGTGTT
28sRNA-3p-5lkr	Phos	TCCGTGTTTCAAGACGGgctcacgctggacgttcgag
28sRNA-3p-3lkr-TR		CCTGCTACCGACAGTTCACGACagccacggtcaggctgcgtccgaTGTTTAGACTCCTTGG
28sRNA5p-5lkr	Phos	CCCGTGCGCTCgctccagcagtcgtgagggc
28sRNA5p-3lkr-cy5		GGACGCAGGTCCATGGCTGAgcgtgcaggcactggtcacggccacGTCGCCGCCGAC
Lower case: probe binding sites; Underlined: primer binding sites.
